# Supplementary material for: Blind recognition of binary cyclic codes
Source: Springer Nature journal article supplement (doi:10.1186/1687-1499-2013-218), 2013-08-30
Supplement: 13638_2013_792_MOESM2_ESM.pdf [file 13638_2013_792_MOESM2_ESM.pdf]

# Observed Window

Packet 1

Packet 2

Packet  $M$
